# Supplementary material
Source: publisher figshare collection journal article supplement (https://gsapubs.figshare.com/ndownloader/files/23307941)
Supplement: Supplementary file 1 [file 23307941]

# Terrestrial colonization of the Balearic Islands: New evidence for the Mediterranean sea-level drawdown during the Messinian Salinity Crisis

Guillem Mas\*, Agnès Maillard, Josep A. Alcover, Joan J. Fornós, Pere Bover and Enric Torres-Roig.

\*Corresponding author now at Grup de recerca Ciències de la Terra, Universitat de les Illes Balears, E-07122 Palma (Mallorca), Spain. Email Address: [guillem\\_mas@gmail.com](mailto:guillem_mas@gmail.com)

DOI: <https://doi.org/10.1130/G40260.1>

## Supplementary Figures (DR1 and DR2):

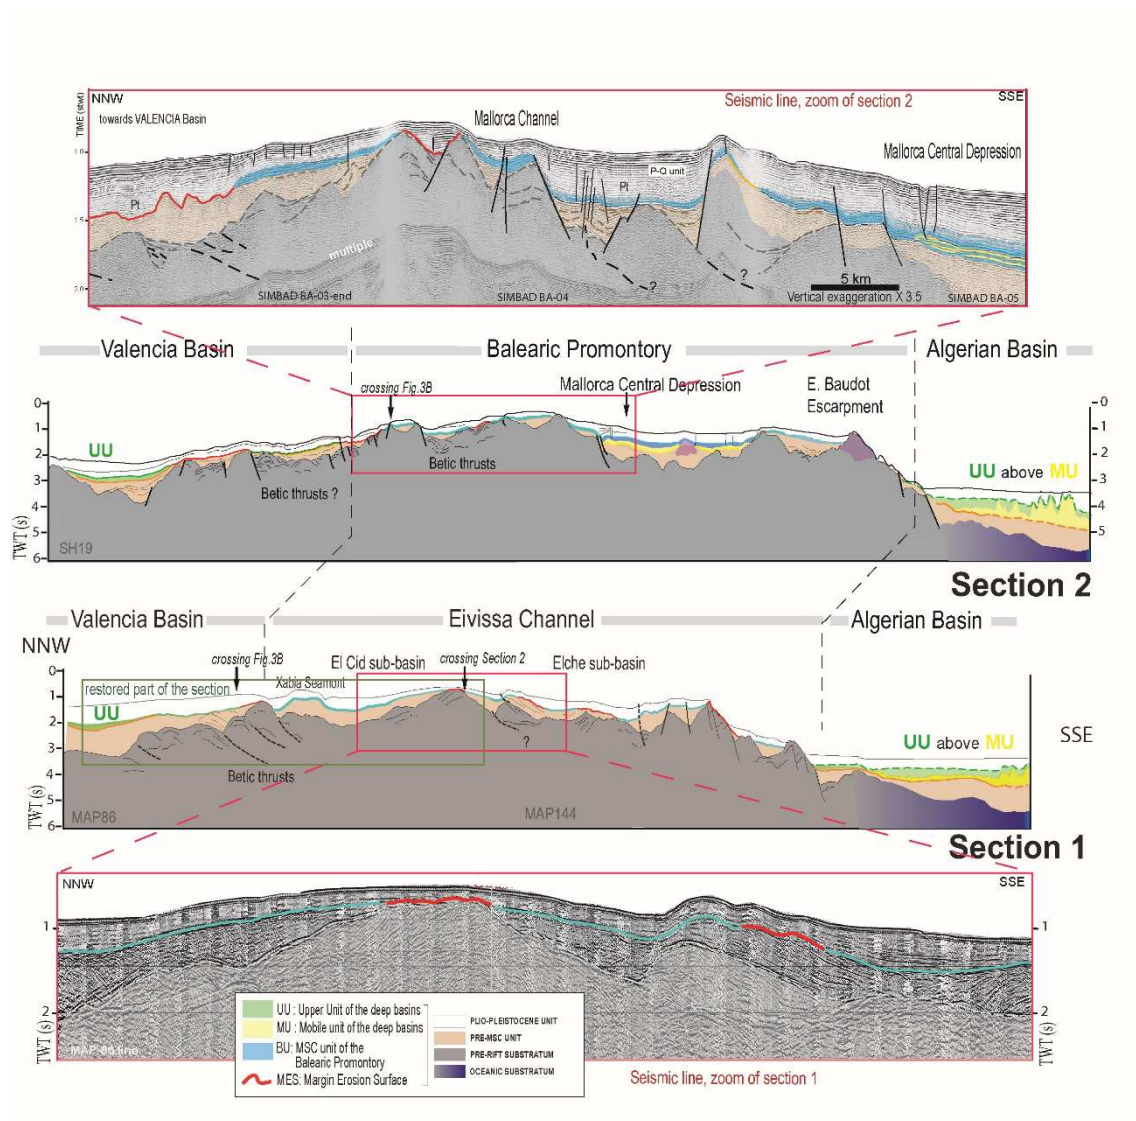

**Figure DR1.** Sections crossing the Eivissa and Mallorca Channels. See figure 1 for location. Section 1 displays thin MSC unit in small perched sub-basins, deformed and uplifted by recent tectonics. Seismic line (zoom of section 1) reveals large-scale flexure and small-scale folds. MSC marker and the seafloor are parallel, attesting for very

recent (Present-day) deformation. Section 2 joins the Valencia Basin to the Algerian one through the Mallorca Channel and the Mallorca Central Depression. Seismic line (zoom of section 2) shows post-MSC subsidence associated with normal faulting. This sub-basin was probably closed during MSC, allowing salt precipitation in higher position compared to the deep basinal salt and explaining its poorly eroded character despite its elevated position.

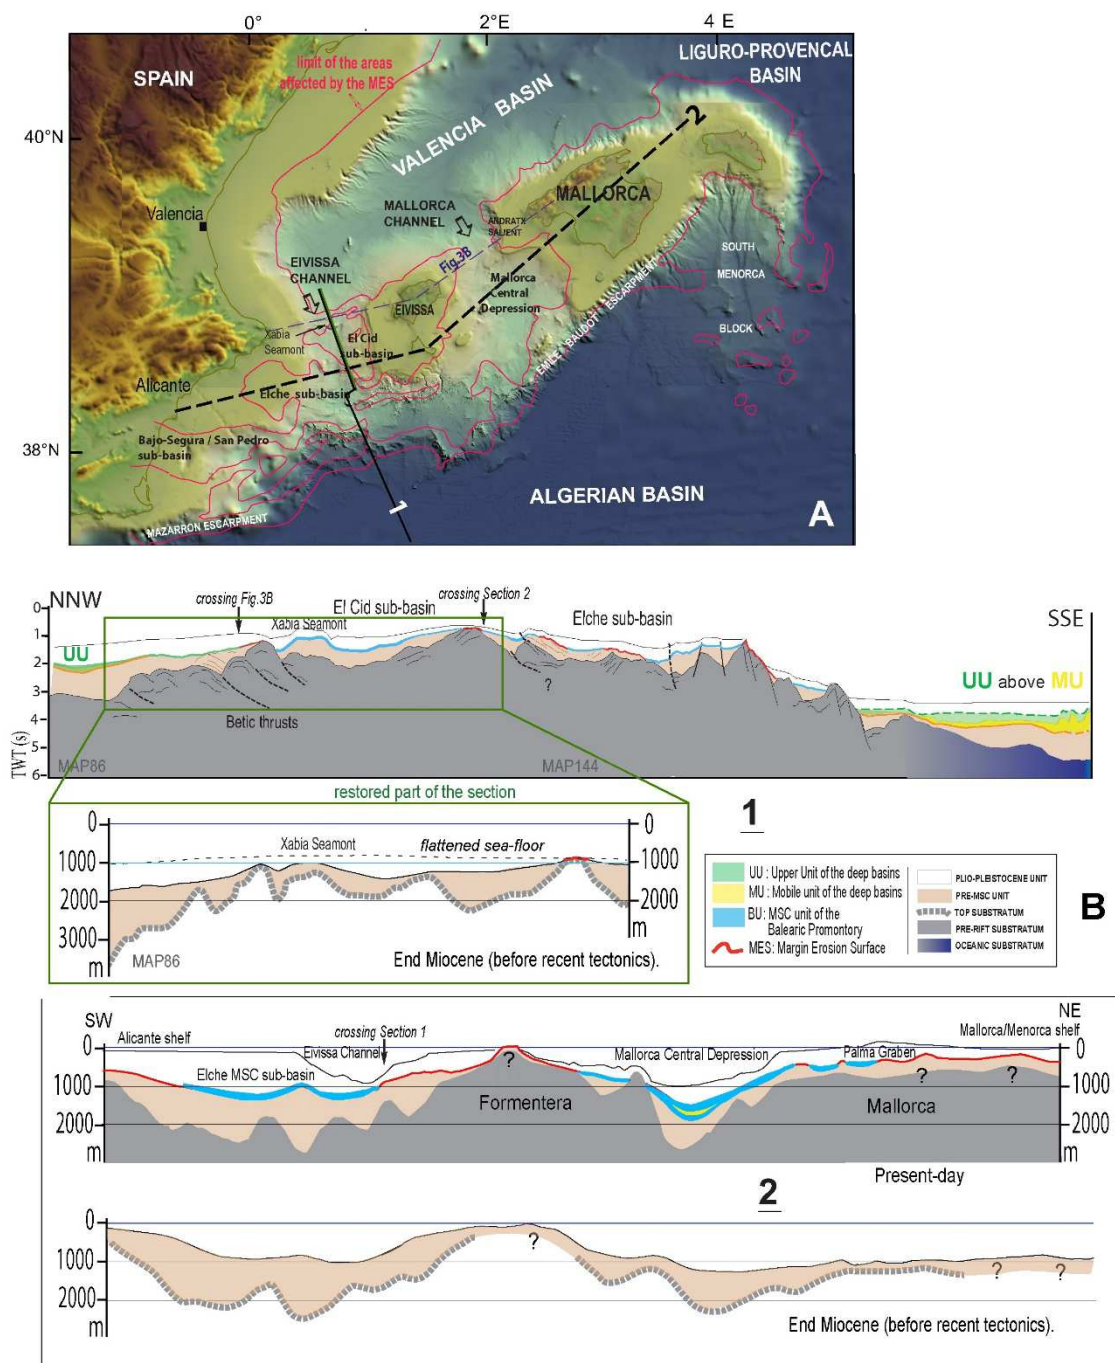

**Figure DR2.** A: Bathymetric map of the Balearic Promontory with the location of the sections. In red, contour limits of the eroded areas during the sea-level drawdown (MES). B: Sections on the Balearic Promontory and their End Miocene restoration. See figure DR-1 for comment of section 1 crossing the Balearic Promontory from the Valencia Basin to the Algerian one. The end of Miocene restoration of the seismic line MAP-86, assuming important post-MSC deformation (see seismic line figure DR-1), shows that the Eivissa Channel was deep ( $>1,000$  m) during the Messinian. Section 2 connects the Alicante to Mallorca passing across two deep sub-basins (Elche and the Central Depression sub-basins), which recorded major post-MSC subsidence. The removal of the thick Plio-Pleistocene prograding Alicante shelf is responsible for an important isostatic rebound partly compensated by the tectonic uplift (200-300 m). In the Central Mallorca Depression, subsidence is mainly due to a tectonic flexure, and stays deep enough ( $> 1000$  m, deeper than the Elche sub-basin) at the end of Miocene to allow salt deposition. End Messinian restoration was made by: a) removing post-MSC deformation by (i) flattening the pos-MSC deformation, (ii) assuming regional uplift in the Eivissa Chanel following seismic regional interpretation (large scale flexure), and b) calculating a local isostatic rebound removal of the Plio-Pleistocene load and assuming a mean 20 km thick crust in the Balearic Promontory. The exact nature of the pre-MSC units is unknown. Crustal thickness is not precise. Both last statements lead to 100 m vertical uncertainties in the isostatic calculations.
